# Supplementary material for: First evidence of active transpressive surface faulting at the front of the eastern Southern Alps, northeastern Italy. Insight on the 1511 earthquake seismotectonics
Source: Copernicus journal article supplement (doi:10.5194/se-2017-131), 2018-01-02
Supplement: Supplementary file 1 [file se-2017-131-supplement.pdf]

**Auxiliary material:**  
**Table 1:**

Units description

Unit 1: ploughed soil, made of brownish silt with sparse cm-size polygenic pebbles.

Unit 2: colluvial deposit made of yellowish/brownish sandy silt with sparse cm-size polygenic pebbles and charcoals fragments.

Interpretazione stratigrafiche nel unità poligeniche tagliamento

Unit 3: colluvial deposit made of brownish massive sandy silt containing cm-size polygenic pebbles (mostly organised in gravel lenses), charcoal fragments and Fe-Mn concretions.

Unit 4: alluvial deposit made of clast-supported gravel with brownish silty matrix.

Unit 5: colluvial deposit made of massive yellowish-brownish sandy silt containing cm-size polygenic pebbles (mostly organised in gravel lenses), charcoal fragments and Fe-Mn concretions

Unit 6: colluvial deposit made of yellowish and locally brownish clayey silt with sparse clasts (10 cm maximum size). The deposit underwent pedogenesis which altered the surface of the clasts and the whole sediment structure, and determined the formation of Fe-Mn concretions.

Unit 7: alluvial deposit made of polygenic gravel (cm-size pebbles) laterally grading to clayey silt with sparse pebbles. The pebbles lithology attests that the deposit has been fed by the Tagliamento R. catchment..

Unit 8: bedrock represented by the Savorgnano Flysch (Ypresian, Early Eocene).

**Table 2:**

(INNOVA SCARL laboratory). Centro per lo Sviluppo ed il trasferimento dell'Innovazione nel Settore dei Beni culturali e Ambientali – INNOVA Scarl. Via Cairoli 81, 81100 San Nicola La Strada. Italy

Radiocarbon age BP: 1469±33 95.4 (2 sigma) cal AD 544 – 646

Radiocarbon age BP: 1503±42 (2 sigma) cal AD 526 – 642

Radiocarbon age BP: 6060±79 (2 sigma) cal BC 5211 – BC 4792

Radiocarbon age BP: 291±37 (2 sigma) cal AD 1485 – AD 1792

Radiocarbon age BP: 5596±56 (2 sigma) cal BC 4535 – BC 4344

Radiocarbon age BP: 1225±45 (2 sigma) cal AD 674 – AD 893

Radiocarbon age BP: 1026±75 (2 sigma) cal AD 945 – AD
